# Supplementary material
Source: MDPI journal article supplement (https://www.mdpi.com/2073-4395/11/12/2385)
Supplement: s1 [file s1 › Data_v1.1.xlsx]

## Sheet: France
Category*	Origin	GI Product	Type**	Supermarket	Number of products	Products per GI	Products in the category	All products	Number of brands	Supermarket's brand?	Brands per GI	Brands per category	Total brands
1.1	France	Dinde de Bresse	PDO	#2	1	1	6	462	1	No	1	3	83
		Poularde de Bresse	PDO	#2	4	4			2	No	2
		Volailles de Loué	PGI	#2	1	1			1	No	1
1.2	France	Boudin blanc de Rethel	PGI	#2	1	1	35		1	No	1	15
		Canard à foie gras du Sud-Ouest	PGI	#1	6	13			2	Yes	7
				#2	5				3	Yes
				#4	2				2	No
		Jambon d'Auvergne	PGI	#2	1	1			1	Yes	1
		Jambon de Bayonne	PGI	#1	5	8			2	No	4
				#2	3				2	Yes
		Saucisse de Montbéliard	PGI	#1	1	1			1	Yes	1
		Saucisse de Morteau	PGI	#1	1	2			1	Yes	2
				#2	1				1	No
		Saucisson de l'Ardèche	PGI	#3	1	1			1	Yes	1
		Saucisson sec d'Auvergne	PGI	#3	2	2			1	Yes	1
	Italy	Prosciutto di Parma	PDO	#1	1	2			1	No	2
				#2	1				1	Yes
		Bresaola della Valtellina	PGI	#2	1	1			1	No	1
	Spain	Jamón Serrano	TSG	#1	2	3			2	Yes	3
				#3	1				1	No
1.3	France	Abondance	PDO	#1	1	2	267		1	Yes	2	48
				#2	1				1	No
		Beaufort	PDO	#1	2	3			1	Yes	2
				#3	1				1	Yes
		Bleu d'Auvergne	PDO	#1	1	4			1	Yes	3
				#2	2				1	No
				#3	1				1	Yes
		Bleu de Causses	PDO	#1	1	1			1	Yes	1
		Brie de Meaux	PDO	#2	1	3			1	No	3
				#3	1				1	Yes
				#4	1				1	Yes
		Brillat-Savarin	PGI	#1	1	3			1	Yes	3
				#2	1				1	No
				#4	1				1	Yes
		Brousse du Rove	PDO	#2	1	1			1	No	1
		Camembert de Normandie	PDO	#1	3	13			3	Yes	10
				#2	4				3	Yes
				#3	5				5	Yes
				#4	1				1	Yes
		Cantal	PDO	#1	2	9			1	Yes	6
				#2	3				2	Yes
				#3	3				2	Yes
				#4	1				1	Yes
		Chabichou du Poitou	PDO	#2	1	2			1	No	2
				#3	1				1	No
		Chaource	PDO	#1	2	5			1	Yes	3
				#2	1				1	Yes
				#3	1				0	No
				#4	1				1	Yes
		Charolais	PDO	#2	1	1			1	No	1
		Comté	PDO	#1	17	36			4	Yes	7
				#2	12				5	Yes
				#3	5				2	No
				#4	2				1	No
		Crottin de Chavignol	PDO	#1	1	5			1	Yes	5
				#2	2				2	Yes
				#3	1				1	Yes
				#4	1				1	Yes
		Emmental de Savoie	PGI	#1	1	2			1	Yes	2
				#4	1				1	Yes
		Époisses	PDO	#1	2	5			2	Yes	5
				#2	2				2	No
				#4	1				1	Yes
		Fourme d'Ambert	PDO	#2	3	4			2	Yes	3
				#3	1				1	Yes
		Gruyère	PGI	#2	1	3			1	No	2
				#3	2				1	Yes
		Livarot	PDO	#1	1	2			1	No	2
				#4	1				1	Yes
		Maroilles	PDO	#1	1	3			1	Yes	2
				#2	2				1	No
		Mont d'Or	PDO	#1	2	4			2	Yes	4
				#2	2				2	Yes
		Morbier	PDO	#1	2	3			1	Yes	2
				#2	1				1	No
		Munster	PDO	#1	1	4			1	Yes	4
				#2	2				2	Yes
				#3	1				1	No
		Neufchâtel	PDO	#1	1	4			0	No	3
				#2	2				2	No
				#3	1				1	Yes
		Ossau-Iraty	PDO	#1	2	6			2	Yes	4
				#2	2				2	No
				#4	2				2	Yes
		Picodon	PDO	#3	1	1			1	Yes	1
		Pont-l'Évêque	PDO	#1	2	6			2	Yes	6
				#2	1				1	No
				#3	2				2	Yes
				#4	1				1	Yes
		Pouligny-Saint-Pierre	PDO	#4	1	1			1	Yes	1
		Reblochon	PDO	#1	2	5			2	Yes	4
				#2	3				2	No
		Rocamadour	PDO	#1	1	5			1	Yes	5
				#2	2				2	Yes
				#3	1				1	Yes
				#4	1				1	Yes
		Roquefort	PDO	#1	8	24			3	Yes	9
				#2	5				3	Yes
				#3	4				2	No
				#4	7				4	Yes
		Sainte-Maure de Touraine	PDO	#1	3	6			2	Yes	5
				#2	1				1	No
				#3	1				1	Yes
				#4	1				1	Yes
		Saint-Marcellin	PGI	#2	2	3			2	Yes	3
				#3	1				1	Yes
		Saint-Nectaire	PDO	#1	2	6			1	Yes	4
				#2	2				1	No
				#3	1				1	Yes
				#4	1				1	Yes
		Selles-sur-Cher	PDO	#2	1	2			1	No	2
				#4	1				1	Yes
		Tomme de Savoie	PGI	#1	1	4			1	Yes	3
				#2	3				2	No
		Tomme des Pyrénées	PGI	#1	1	5			1	Yes	4
				#2	2				1	Yes
				#3	1				1	Yes
				#4	1				1	Yes
		Valençay	PDO	#1	1	2			1	No	2
				#4	1				1	Yes
	Greece	Feta	PDO	#1	2	9			1	Yes	7
				#2	4				3	Yes
				#3	3				3	Yes
	Italy	Gorgonzola	PDO	#1	1	6			1	Yes	5
				#2	1				1	Yes
				#3	2				1	Yes
				#4	2				2	No
		Grana Padano	PDO	#1	5	7			2	Yes	3
				#2	2				1	Yes
		Mozzarella di Bufala Campana	PDO	#1	4	12			2	Yes	8
				#2	6				4	Yes
				#3	2				1	Yes
		Parmigiano Reggiano	PDO	#1	5	23			2	Yes	8
				#2	14				5	Yes
				#3	3				2	Yes
				#4	1				1	No
		Pecorino Romano	PDO	#1	1	3			1	No	3
				#2	1				1	Yes
				#3	1				1	Yes
	Netherlands	Edam Holland	PGI	#2	1	2			0	No	1
				#3	1				1	No
		Gouda Holland	PGI	#1	2	7			1	Yes	4
				#2	3				2	Yes
				#3	2				2	No
1.4	France	Crème d’Isigny	PDO	#1	5	10	13		2	Yes	5	5
				#2	3				2	No
				#3	1				1	Yes
				#4	1				1	Yes
		Crème de Bresse	PDO	#1	1	3			1	Yes	3
				#2	1				1	No
				#4	1				1	Yes
1.5	France	Beurre Charentes-Poitou	PDO	#1	3	7	19		2	No	4	10
				#2	1				1	No
				#3	2				2	No
				#4	1				1	Yes
		Beurre d'Isigny	PDO	#1	2	5			2	Yes	3
				#2	2				2	No
				#3	1				1	No
		Huile d'olive de la vallée des Baux-de-Provence	PDO	#1	1	1			1	Yes	1
		Huile d'olive de Nyons	PDO	#1	1	3			1	Yes	2
				#2	2				1	No
	Greece	Sitia Lasithiou Kritis	PDO	#1	2	2			1	Yes	1
	Italy	Toscano	PGI	#1	1	1			1	Yes	1
1.6	France	Ail de la Drôme	PGI	#2	3	3	77		1	No	1	10
		Ail fumé d'Arleux	PGI	#2	1	1			1	Yes	1
		Ail violet de Cadours	PDO	#2	1	1			1	No	1
		Châtaigne d'Ardèche	PDO	#2	4	4			1	No	1
		Clémentine de Corse	PGI	#1	1	1			0	No	0
		Farine de châtaigne corse	PDO	#2	3	3			1	No	1
		Figue de Solliès	PDO	#2	4	4			1	No	1
		Noisette de Cervione	PGI	#2	4	4			1	No	1
		Pruneaux d'Agen	PGI	#1	1	8			1	No	3
				#2	7				2	No
		Riz de Camargue	PGI	#1	2	23			2	Yes	6
				#2	21				4	No
	Greece	Korinthiaki Stafida Vostitsa	PDO	#2	4	4			1	No	1
	Italy	Nocciola di Giffoni	PGI	#2	4	4			1	No	1
		Nocciola Piemonte	PGI	#2	4	4			1	No	1
		Nocciola Romana	PDO	#2	5	5			1	No	1
	Spain	Avellana de Reus	PDO	#2	3	3			1	No	1
		Espárrago de Navarra	PGI	#2	1	1			1	No	1
		Pasas de Málaga	PDO	#2	4	4			1	No	1
1.8	France	Cidre de Bretagne	PGI	#3	2	2	24		2	No	2	14
		Piment d'Espelette	PDO	#1	2	7			2	Yes	4
				#2	4				1	No
				#3	1				1	Yes
		Thym de Provence	PGI	#2	6	6			1	No	1
	Italy	Aceto Balsamico di Modena	PGI	#1	2	9			2	No	6
				#2	6				4	No
				#3	1				1	No
	Cambodia	Poivre de Kampot	PGI	#2	12	12	12		2	No	2
2.5	France	Pâtes d'Alsace	PGI	#2	4	4	4		2	Yes	2	2
2.6	France	Sel de Guérande	PGI	#2	4	5	5		2	No	3	3
				#3	1				1	Yes
*Category
1.1	Fresh meat
1.2	Meat products
1.3	Cheeses
1.4	Other products of animal origin
1.5	Oils and fats
1.6	Fruits, vegetables and cereals fresh or processed
1.7	Fresh fish, mollusks and crustaceans and derived
1.8	Others such as spices
2.1	Beers
2.2	Chocolate and derived
2.3	Bread, pastry, cakes and alike
2.4	Beverages from plant extracts
2.5	Pasta
2.6	Salt
2.7	Natural gums and resins
2.8	Mustard paste
2.9	Hay
2.1	Essential oils
2.11	Cork
2.12	Cochineal
2.13	Flowers and ornamental plants
2.14	Cotton
2.15	Wool
2.16	Wicker
2.17	Scutched flax
2.18	Leather
2.19	Fur
2.2	Feather
**Type
PDO	Protected Designation of Origin
PGI	Protected Geographical Indication
TSG	Traditional Specialities Guaranteed
DO	Denominação de Origem (Designation of Origin)
IP	Indicação de Procedência (Indication of Source)
IG	Indicación Geográfica (Geographical Indication)

## Sheet: Germany
Category*	Origin	GI Product	Type**	Supermarket	Number of products	Products per GI	Products in the category	All products	Number of brands	Supermarket's brand?	Brands per GI	Brands per category	Total brands
1.2	Germany	Nürnberger Bratwürste	PGI	#1	1	7	46	174	1	Yes	3	12	43
				#2	1				1	Yes
				#4	5				1	Yes
		Schwarzwälder Schinken	PGI	#1	1	7			1	Yes	6
				#2	4				4	Yes
				#4	2				1	Yes
		Thüringer Leberwurst	PGI	#1	1	1			1	No	1
		Thüringer Rostbratwurst	PGI	#1	1	13			1	Yes	5
				#2	2				1	No
				#4	10				3	Yes
		Thüringer Rotwurst	PGI	#1	1	1			0	No	0
	Austria	Tiroler Speck	PGI	#4	1	1			1	Yes	1
	Italy	Bresaola della Valtellina	PGI	#4	1	1			1	Yes	1
		Mortadella Bologna	PGI	#1	1	2			1	No	2
				#4	1				1	Yes
		Prosciutto di Parma	PDO	#1	1	2			1	No	2
				#4	1				1	Yes
		Prosciutto di San Daniele	PDO	#4	1	1			1	Yes	1
	Spain	Jamón Serrano	TSG	#1	4	10			2	Yes	4
				#2	1				1	No
				#4	5				1	Yes
1.3	Austria	Tiroler Bergkäse	PDO	#2	1	1	103		1	Yes	1	24
	Denmark	Esrom	PGI	#1	1	2			1	No	1
				#4	1				1	No
	France	Brie de Meaux	PDO	#1	1	1			0	No	0
		Camembert de Normandie	PDO	#1	4	4			2	No	2
		Comté	PDO	#1	1	1			0	No	0
		Munster	PDO	#4	1	1			1	No	1
		Roquefort	PDO	#1	2	3			1	No	1
				#2	1				0	No
		Tomme de Savoie	PGI	#1	1	1			1	No	1
	Greece	Feta	PDO	#1	2	9			2	Yes	9
				#2	5				5	Yes
				#4	2				2	Yes
	Italy	Gorgonzola	PDO	#1	1	6			1	No	2
				#2	3				2	No
				#4	2				2	Yes
		Grana Padano	PDO	#1	5	12			4	Yes	4
				#2	5				1	No
				#4	2				1	Yes
		Mozzarella	TSG	#1	7	17			4	Yes	7
				#2	4				3	Yes
				#4	6				2	Yes
		Mozzarella di Bufala Campana	PDO	#1	1	4			1	No	2
				#2	1				0	No
				#4	2				1	Yes
		Parmigiano Reggiano	PDO	#1	3	12			2	No	5
				#2	5				3	No
				#4	4				1	Yes
		Pecorino Romano	PDO	#1	1	3			0	No	1
				#2	1				0	No
				#4	1				1	Yes
	Netherlands	Gouda Holland	PGI	#1	3	15			2	Yes	5
				#2	7				3	No
				#4	5				2	Yes
		Noord-Hollandse Gouda	PDO	#1	1	1			1	No	1
	Spain	Queso Manchego	PDO	#1	1	10			1	No	5
				#2	9				4	No
1.4	Germany	Obazda	PGI	#1	2	3	3		1	No	1	1
				#3	1				1	No
1.5	Greece	Vorios Mylopotamos Rethymnis Kritis	PDO	#4	2	2	5		1	No	1	3
	Italy	Chianti Classico	PDO	#4	1	1			1	No	1
		Riviera Ligure	PDO	#4	1	1			1	No	1
		Terra di Bari	PDO	#4	1	1			1	Yes	1
1.6	Germany	Bayerischer Meerrettich	PGI	#4	2	2	7		1	No	1	5
	Greece	Elia Kalamatas	PDO	#4	5	5			4	Yes	4
1.8	Italy	Aceto Balsamico di Modena	PGI	#4	4	4	4		3	No	3	3
2.3	Germany	Bayrischer Blockmalz	PGI	#3	1	1	4		1	No	1	3
		Westfälischer Pumpernickel	PGI	#2	2	3			2	Yes	3
				#4	1				1	No
2.5	Germany	Schwäbische Spätzle	PGI	#2	2	2	2		1	No	1	1
*Category
1.1	Fresh meat
1.2	Meat products
1.3	Cheeses
1.4	Other products of animal origin
1.5	Oils and fats
1.6	Fruits, vegetables and cereals fresh or processed
1.7	Fresh fish, mollusks and crustaceans and derived
1.8	Others such as spices
2.1	Beers
2.2	Chocolate and derived
2.3	Bread, pastry, cakes and alike
2.4	Beverages from plant extracts
2.5	Pasta
2.6	Salt
2.7	Natural gums and resins
2.8	Mustard paste
2.9	Hay
2.1	Essential oils
2.11	Cork
2.12	Cochineal
2.13	Flowers and ornamental plants
2.14	Cotton
2.15	Wool
2.16	Wicker
2.17	Scutched flax
2.18	Leather
2.19	Fur
2.2	Feather
**Type
PDO	Protected Designation of Origin
PGI	Protected Geographical Indication
TSG	Traditional Specialities Guaranteed
DO	Denominação de Origem (Designation of Origin)
IP	Indicação de Procedência (Indication of Source)
IG	Indicación Geográfica (Geographical Indication)

## Sheet: Greece
Category*	Origin	GI Product	Type**	Supermarket	Number of products	Products per GI	Products in the category	All products	Number of brands	Supermarket's brand?	Brands per GI	Brands per category	Total brands
1.2	Italy	Prosciutto di Parma	PDO	#4	1	1	3	283	1	No	1	2	87
		Jamón Serrano	TSG	#4	2	2			1	No	1
1.3	Greece	Anevato	PDO	#1	1	1	229		1	No	1	67
		Feta	PDO	#1	25	73			8	Yes	17
				#2	24				8	No
				#3	7				6	No
				#4	17				4	No
		Galotyri	PDO	#1	1	2			1	Yes	2
				#2	1				1	No
		Graviera Kritis	PDO	#1	2	6			1	Yes	5
				#2	2				2	No
				#3	1				1	No
				#4	1				1	No
		Graviera Naxou	PDO	#1	1	7			1	Yes	3
				#2	1				1	No
				#3	2				1	No
				#4	3				0	No
		Kalathaki Limnou	PDO	#2	1	2			1	No	1
				#4	1				0	No
		Kasseri	PDO	#1	4	24			2	Yes	11
				#2	6				5	No
				#3	8				6	No
				#4	6				4	No
		Katiki Domokou	PDO	#1	1	4			0	No	2
				#2	1				1	No
				#3	1				1	No
				#4	1				1	No
		Kefalograviera	PDO	#1	6	15			3	Yes	6
				#2	5				4	No
				#3	2				2	No
				#4	2				1	No
		Kopanisti	PDO	#1	1	2			0	No	1
				#3	1				1	No
		Ladotyri Mytilinis	PDO	#1	1	4			0	No	1
				#2	1				1	No
				#3	1				0	No
				#4	1				1	No
		Manouri	PDO	#2	1	3			1	No	3
				#3	2				2	No
		San Michali	PDO	#2	1	1			1	No	1
		Xynomyzithra Kritis	PDO	#2	1	1			1	No	1
	Denmark	Danablu	PGI	#1	1	2			1	No	1
				#3	1				1	No
		Havarti	PGI	#1	4	8			2	No	2
				#3	3				1	No
				#4	1				1	No
	France	Brie de Meaux	PDO	#1	1	1			1	No	1
		Camembert de Normandie	PDO	#1	4	4			3	No	3
		Comté	PDO	#1	1	1			1	No	1
		Emmental français est-central	PGI	#1	2	2			2	No	2
		Salers	PDO	#1	1	1			0	No	0
		Livarot	PDO	#1	1	1			0	No	0
		Munster	PDO	#1	1	1			0	No	0
		Pont-l'Évêque	PDO	#1	1	1			1	No	1
		Roquefort	PDO	#1	1	5			1	No	4
				#2	3				3	No
				#3	1				1	No
	Ireland	Imokilly Regato	PDO	#1	2	2			1	No	1
	Italy	Gorgonzola	PDO	#1	1	4			1	No	3
				#2	2				2	No
				#4	1				0	No
		Grana Padano	PDO	#1	2	7			1	Yes	5
				#2	2				1	No
				#3	1				1	No
				#4	2				2	No
		Mozzarella	TSG	#1	7	15			5	Yes	7
				#3	4				4	No
				#4	4				2	No
		Mozzarella di Bufala Campana	PDO	#1	2	3			1	No	2
				#4	1				1	No
		Parmigiano Reggiano	PDO	#1	8	14			2	Yes	5
				#3	5				2	No
				#4	1				1	No
		Pecorino Romano	PDO	#3	1	3			1	No	2
				#4	2				1	No
		Provolone Valpadana	PDO	#1	1	1			1	No	1
	Netherlands	Gouda Holland	PGI	#1	7	8			3	Yes	3
				#2	1				0	No
	United Kingdom	Blue Stilton cheese	PDO	#1	3	5	6		1	No	1
				#2	2				1	No
		West Country farmhouse Cheddar cheese	PDO	#1	1	1			1	No	1
1.5	Greece	Exeretiko Partheno Eleolado Selino Kritis	PDO	#3	2	2	11		1	No	1	6
		Kalamata	PDO	#1	1	1			1	No	1
		Kolymvari Chanion Kritis	PDO	#1	4	4			2	Yes	2
		Olympia	PGI	#3	1	1			1	No	1
		Vorios Mylopotamos Rethymnis Kritis	PDO	#3	2	2			1	No	1
		Exeretiko partheno eleolado Trizinia	PDO	#3	1	1			1	No	1
1.6	Greece	Fasolia (plake megalosperma) Prespon Florinas	PGI	#2	1	1	26		1	No	1	14
		Fasolia Gigantes — Elefantes Kastorias	PGI	#2	1	2			1	No	2
				#3	1				1	No
		Fasolia Gigantes Elefantes Prespon Florinas	PGI	#1	1	1			1	Yes	1
		Fasolia Kattavias Rodou	PGI	#1	1	1			1	Yes	1
		Fasolia Vanilies Feneou	PGI	#1	1	1			1	Yes	1
		Mandarini Chiou	PGI	#1	1	1			0	No	0
		Mila Delicious Pilafa de Tripoli	PDO	#2	1	1			0	No	0
		Mila Zagoras Piliou	PDO	#1	1	5			1	No	1
				#2	1				1	No
				#3	3				1	No
		Patata Kato Nevrokopiou	PGI	#2	1	3			0	No	2
				#3	2				2	No
		Patata Naxou	PGI	#1	1	1			1	Yes	1
		Portokalia Maleme Chanion Kritis	PDO	#1	1	2			1	No	2
				#2	1				1	No
		Rodi Ermionis	PDO	#3	2	2			1	No	1
		Throumpa Thassou	PDO	#1	2	4			2	Yes	4
				#2	1				1	No
				#4	1				1	No
	France	Pruneaux d'Agen	PGI	#3	1	1			1	No	1
1.8	Greece	Krokos Kozanis	PDO	#2	2	2	2		0	No	0	0
2.3	Greece	Kritiko paximadi	PGI	#2	1	4	4		1	No	3	3
				#3	2				2	No
				#4	1				1	Yes
2.7	Greece	Masticha Chiou	PDO	#2	2	2	2		0	No	0	0
*Category
1.1	Fresh meat
1.2	Meat products
1.3	Cheeses
1.4	Other products of animal origin
1.5	Oils and fats
1.6	Fruits, vegetables and cereals fresh or processed
1.7	Fresh fish, mollusks and crustaceans and derived
1.8	Others such as spices
2.1	Beers
2.2	Chocolate and derived
2.3	Bread, pastry, cakes and alike
2.4	Beverages from plant extracts
2.5	Pasta
2.6	Salt
2.7	Natural gums and resins
2.8	Mustard paste
2.9	Hay
2.1	Essential oils
2.11	Cork
2.12	Cochineal
2.13	Flowers and ornamental plants
2.14	Cotton
2.15	Wool
2.16	Wicker
2.17	Scutched flax
2.18	Leather
2.19	Fur
2.2	Feather
**Type
PDO	Protected Designation of Origin
PGI	Protected Geographical Indication
TSG	Traditional Specialities Guaranteed
DO	Denominação de Origem (Designation of Origin)
IP	Indicação de Procedência (Indication of Source)
IG	Indicación Geográfica (Geographical Indication)

## Sheet: Italy
Category*	Origin	GI Product	Type**	Supermarket	Number of products	Products per GI	Products in the category	All products	Number of brands	Supermarket's brand?	Brands per GI	Brands per category	Total brands
1.1	Italy	Agnello di Sardegna	PGI	#2	1	1	1	330	0	No	0	0	65
1.2	Italy	Salamini italiani alla cacciatora	PDO	#1	1	2	67		1	Yes	2	22
				#2	1				1	Yes
		Prosciutto di Parma	PDO	#1	2	4			1	Yes	2
				#3	1				1	Yes
				#4	1				1	Yes
		Bresaola della Valtellina	PGI	#2	7	12			5	Yes	8
				#4	5				5	Yes
		Prosciutto Toscano	PDO	#1	1	5			1	No	3
				#2	2				1	No
				#3	2				2	No
		Cotechino Modena	PGI	#1	1	4			1	Yes	3
				#2	2				1	Yes
				#4	1				1	No
		Mortadella Bologna	PGI	#1	2	12			2	Yes	6
				#2	7				2	Yes
				#4	3				2	No
		Speck Alto Adige	PGI	#1	2	9			2	Yes	7
				#2	4				3	Yes
				#4	3				3	Yes
		Prosciutto di Norcia	PGI	#1	2	3			2	No	3
				#2	1				1	No
		Prosciutto di Modena	PDO	#1	1	2			1	No	2
				#4	1				1	Yes
		Prosciutto di San Daniele	PDO	#1	3	4			1	No	2
				#4	1				1	No
		Prosciutto Amatriciano	PGI	#2	2	3			0	No	1
				#4	1				1	No
		Finocchiona	PGI	#2	1	1			1	No	1
		Salame Felino	PGI	#2	1	2			1	No	2
				#4	1				1	Yes
		Coppa Piacentina	PDO	#3	1	2			1	No	2
				#4	1				1	No
		Salsiccia di Calabria	PDO	#3	1	1			1	No	1
		Zampone Modena	PGI	#1	1	1			1	No	1
1.3	Italy	Asiago	PDO	#1	1	6	130		0	No	3	18
				#2	2				1	Yes
				#3	1				1	Yes
				#4	2				1	Yes
		Caciocavallo Silano	PDO	#2	2	2			2	No	2
		Fiore Sardo	PDO	#2	1	1			1	No	1
		Fontina	PDO	#2	1	1			1	No	1
		Formaggio di Fossa di Sogliano	PDO	#2	1	1			1	No	1
		Gorgonzola	PDO	#1	2	9			2	No	5
				#2	3				2	No
				#3	1				1	No
				#4	3				3	Yes
		Grana Padano	PDO	#1	2	25			2	Yes	9
				#2	10				3	Yes
				#3	8				3	Yes
				#4	5				2	Yes
		Montasio	PDO	#2	1	1			1	No	1
		Mozzarella di Bufala Campana	PDO	#1	2	8			1	No	5
				#2	1				1	No
				#3	3				2	No
				#4	2				2	Yes
		Parmigiano Reggiano	PDO	#1	5	40			3	Yes	11
				#2	11				5	Yes
				#3	11				5	Yes
				#4	13				2	Yes
		Pecorino Romano	PDO	#2	6	10			5	Yes	8
				#3	2				2	Yes
				#4	2				1	Yes
		Pecorino Sardo	PDO	#1	1	3			1	No	2
				#2	2				1	No
		Pecorino Siciliano	PDO	#2	1	1			0	No	0
		Piave	PDO	#2	1	1			1	No	1
		Provolone Valpadana	PDO	#2	3	7			1	No	3
				#3	2				1	Yes
				#4	2				1	Yes
		Quartirolo Lombardo	PDO	#3	1	1			1	Yes	1
		Ragusano	PDO	#3	1	1			1	No	1
		Robiola di Roccaverano	PDO	#2	1	1			1	No	1
		Squacquerone di Romagna	PDO	#2	1	2			1	No	2
				#4	1				1	Yes
		Taleggio	PDO	#2	1	2			1	No	2
				#3	1				1	Yes
	Greece	Feta	PDO	#1	1	7			1	Yes	5
				#2	3				2	No
				#3	2				2	Yes
				#4	1				1	No
1.4	Italy	Miele della Lunigiana	PDO	#1	1	1	1		0	No	0	0
1.5	Italy	Canino	PDO	#4	1	1	8		1	No	1	6
		Colline Pontine	PDO	#2	1	1			1	No	1
		Terra di Bari	PDO	#4	1	1			1	Yes	1
		Toscano	PGI	#1	1	3			1	Yes	3
				#2	1				1	No
				#4	1				1	Yes
		Umbria	PDO	#2	1	1			1	No	1
		Val di Mazara	PDO	#4	1	1			1	Yes	1
1.6	Italy	Aglio Bianco Polesano	PDO	#2	1	1	31		1	Yes	1	11
		Aglio di Voghiera	PDO	#2	1	1			1	No	1
		Arancia di Ribera	PDO	#2	1	1			1	No	1
		Cappero di Pantelleria	PGI	#2	1	1			1	No	1
		Cipolla Rossa di Tropea Calabria	PGI	#2	1	2			1	No	2
				#4	1				1	Yes
		Clementine di Calabria	PGI	#4	1	1			1	No	1
		Fagiolo Cannellino di Atina	PDO	#4	1	1			1	No	1
		Fichi di Cosenza	PDO	#3	1	1			1	No	1
		Lenticchia di Castelluccio di Norcia	PGI	#2	2	4			2	No	2
				#4	2				2	No
		Limone di Sorrento	PGI	#4	1	1			0	No	0
		Mela Alto Adige	PGI	#2	1	2			1	No	2
				#4	1				1	No
		Mela Val di Non	PDO	#4	4	4			2	Yes	2
		Nocciola di Giffoni	PGI	#2	1	1			1	No	1
		Nocciola Piemonte	PGI	#2	1	1			1	No	1
		Patata di Bologna	PDO	#2	1	1			1	No	1
		Pera dell'Emilia Romagna	PGI	#1	1	1			1	No	1
		Pomodoro di Pachino	PGI	#2	1	2			1	No	2
				#4	1				1	Yes
		Pomodoro San Marzano dell'Agro Sarnese-Nocerino	PDO	#2	1	2			1	No	2
				#3	1				1	Yes
		Radicchio Rosso di Treviso	PGI	#4	1	1			1	Yes	1
		Radicchio Variegato di Castelfranco	PGI	#4	1	1			0	No	0
		Riso Nano Vialone Veronese	PGI	#2	1	1			1	No	1
1.8	Italy	Aceto Balsamico di Modena	PGI	#1	2	17	17		2	Yes	9	9
				#2	5				4	Yes
				#4	10				6	Yes
2.1	Germany	Münchener Bier	PGI	#4	2	1	2		2	No	1	1
2.3	Italy	Cantuccini Toscani	PGI	#2	2	4	15		2	No	3	8
				#4	2				2	Yes
		Pane casareccio di Genzano	PGI	#2	1	1			0	No	0
		Panforte di Siena	PGI	#2	1	1			1	No	1
		Piadina Romagnola	PGI	#1	3	8			2	Yes	6
				#2	2				2	No
				#4	3				2	Yes
		Ricciarelli di Siena	PGI	#2	1	1			1	No	1
2.5	Italy	Maccheroncini di Campofilone	PGI	#2	1	1	58		1	No	1	3
		Pasta di Gragnano	PGI	#1	23	56			1	No	3
				#2	8				1	No
				#4	25				2	Yes
		Pizzoccheri della Valtellina	PGI	#2	1	1			1	No	1
*Category
1.1	Fresh meat
1.2	Meat products
1.3	Cheeses
1.4	Other products of animal origin
1.5	Oils and fats
1.6	Fruits, vegetables and cereals fresh or processed
1.7	Fresh fish, mollusks and crustaceans and derived
1.8	Others such as spices
2.1	Beers
2.2	Chocolate and derived
2.3	Bread, pastry, cakes and alike
2.4	Beverages from plant extracts
2.5	Pasta
2.6	Salt
2.7	Natural gums and resins
2.8	Mustard paste
2.9	Hay
2.1	Essential oils
2.11	Cork
2.12	Cochineal
2.13	Flowers and ornamental plants
2.14	Cotton
2.15	Wool
2.16	Wicker
2.17	Scutched flax
2.18	Leather
2.19	Fur
2.2	Feather
**Type
PDO	Protected Designation of Origin
PGI	Protected Geographical Indication
TSG	Traditional Specialities Guaranteed
DO	Denominação de Origem (Designation of Origin)
IP	Indicação de Procedência (Indication of Source)
IG	Indicación Geográfica (Geographical Indication)

## Sheet: Poland
Category*	Origin	GI Product	Type**	Supermarket	Number of products	Products per GI	Products in the category	All products	Number of brands	Supermarket's brand?	Brands per GI	Brands per category	Total brands
1.2	Poland	Kiełbasa lisiecka	PGI	#4	1	1	21	208	1	No	1	10	61
	France	Jambon de Bayonne	PGI	#1	1	1			1	Yes	1
		Saucisson sec d'Auvergne	PGI	#3	1	1			1	No	1
	Italy	Mortadella Bologna	PGI	#2	1	1			1	No	1
		Prosciutto di Parma	PDO	#1	2	9			2	Yes	7
				#2	3				3	No
				#3	3				2	Yes
				#4	1				1	No
		Prosciutto di San Daniele	PDO	#1	1	1			1	Yes	1
	Spain	Chorizo Riojano	PGI	#2	1	1			1	No	1
		Jamón Serrano	TSG	#1	4	6			1	Yes	3
				#2	1				1	No
				#3	1				1	Yes
1.3	Poland	Bryndza Podhalańska	PDO	#4	1	1	144		0	No	0	39
		Ser koryciński swojski	PGI	#4	1	1			1	No	1
	Denmark	Danablu	PGI	#1	1	3			1	No	1
				#3	1				1	No
				#4	1				1	No
		Havarti	PGI	#2	3	3			1	No	1
	France	Bleu d'Auvergne	PDO	#2	1	2			1	No	1
				#3	1				0	No
		Camembert de Normandie	PDO	#3	1	1			1	No	1
		Cantal	PDO	#1	1	2			1	Yes	2
				#3	1				1	No
		Comte	PDO	#4	1	1			1	No	1
		Époisses	PDO	#2	1	1			1	No	1
		Fourme d'Ambert	PDO	#3	2	3			0	No	1
				#4	1				1	No
		Gruyère	PGI	#2	1	1			1	No	1
		Langres	PDO	#2	1	2			1	No	1
				#4	1				1	No
		Ossau-Iraty	PDO	#1	1	1			1	Yes	1
		Pont-l'Évêque	PDO	#1	1	1			1	Yes	1
		Roquefort	PDO	#1	1	3			1	No	3
				#2	1				1	No
				#3	1				1	No
	Greece	Feta	PDO	#1	3	19			2	Yes	9
				#2	6				5	No
				#3	2				2	No
				#4	8				6	No
		Manouri	PDO	#2	1	3			1	No	2
				#3	1				1	No
				#4	1				1	No
	Italy	Bra	PDO	#2	1	1			1	No	1
		Gorgonzola	PDO	#1	1	14			1	Yes	8
				#2	5				4	No
				#3	5				3	No
				#4	3				3	No
		Grana Padano	PDO	#1	3	15			3	No	10
				#2	5				5	No
				#3	1				1	Yes
				#4	6				5	No
		Mozzarella	TSG	#1	8	34			2	Yes	7
				#2	9				4	No
				#3	13				3	No
				#4	4				2	No
		Mozzarella di Bufala Campana	PDO	#1	3	5			2	Yes	4
				#2	2				2	No
		Parmigiano Reggiano	PDO	#1	4	15			1	Yes	7
				#2	7				5	No
				#3	1				1	Yes
				#4	3				2	No
		Pecorino Romano	PDO	#1	1	5			1	No	4
				#2	2				2	No
				#4	2				1	No
		Toma Piemontese	PDO	#2	1	1			1	No	1
	Netherlands	Hollandse geitenkaas	PGI	#2	1	4			1	No	3
				#3	1				1	No
				#4	2				2	No
	Spain	Queso Manchego	PDO	#1	2	2			1	No	1
	United Kingdom	Blue Stilton cheese	PDO	#4	1	1	1		1	No	1
1.5	Greece	Chania Kritis	PGI	#4	1	1	10		1	No	1	5
		Sitia Lasithiou Kritis	PDO	#1	1	1			1	No	1
	Italy	Sicilia	PGI	#1	1	2			1	No	1
				#2	1				1	No
		Toscano	PGI	#1	1	2			1	No	1
				#2	1				1	No
		Umbria	PDO	#1	1	3			1	No	2
				#2	2				2	No
	Spain	Aceite de Jaén	PGI	#1	1	1			1	No	1
1.6	Poland	Wiśnia nadwiślanka	PDO	#2	1	1	1		1	No	1	1
1.7	Poland	Miód drahimski	PGI	#4	11	11	11		1	No	1	1
1.8	Poland	Podpiwek kujawski	PGI	#3	1	2	20		0	No	0	8
				#4	1				0	No
	Italy	Aceto Balsamico di Modena	PGI	#1	1	18			1	No	8
				#2	7				5	No
				#3	1				1	No
				#4	9				4	No
*Category
1.1	Fresh meat
1.2	Meat products
1.3	Cheeses
1.4	Other products of animal origin
1.5	Oils and fats
1.6	Fruits, vegetables and cereals fresh or processed
1.7	Fresh fish, mollusks and crustaceans and derived
1.8	Others such as spices
2.1	Beers
2.2	Chocolate and derived
2.3	Bread, pastry, cakes and alike
2.4	Beverages from plant extracts
2.5	Pasta
2.6	Salt
2.7	Natural gums and resins
2.8	Mustard paste
2.9	Hay
2.1	Essential oils
2.11	Cork
2.12	Cochineal
2.13	Flowers and ornamental plants
2.14	Cotton
2.15	Wool
2.16	Wicker
2.17	Scutched flax
2.18	Leather
2.19	Fur
2.2	Feather
**Type
PDO	Protected Designation of Origin
PGI	Protected Geographical Indication
TSG	Traditional Specialities Guaranteed
DO	Denominação de Origem (Designation of Origin)
IP	Indicação de Procedência (Indication of Source)
IG	Indicación Geográfica (Geographical Indication)

## Sheet: Portugal
Category*	Origin	GI Product	Type**	Supermarket	Number of products	Products per GI	Products in the category	All products	Number of brands	Supermarket's brand?	Brands per GI	Brands per category	Total brands
1.1	Portugal	Carnalentejana	PDO	#3	2	2	5	199	1	Yes	1	2	56
		Carne Mertolenga	PDO	#1	3	3			1	Yes	1
1.2	Portugal	Alheira de Mirandela	PGI	#1	1	4	27		1	Yes	3	14
				#2	1				1	No
				#3	1				1	No
				#4	1				1	No
		Alheira de Vinhais	PGI	#3	1	1			1	No	1
	Germany	Nürnberger Bratwürste	PGI	#1	1	1			1	No	1
	Italy	Prosciutto di Parma	PDO	#1	2	4			1	No	3
				#3	2				2	No
	Spain	Jamón Serrano	TSG	#1	3	17			2	Yes	7
				#2	6				2	Yes
				#3	8				3	Yes
1.3	Portugal	Queijo de Azeitão	PDO	#2	1	3	94		1	Yes	2	29
				#3	2				1	No
		Queijo de Cabra Transmontano	PDO	#3	1	1			1	No	1
		Queijo de Évora	PDO	#1	1	2			1	Yes	2
				#2	1				1	Yes
		Queijo de Nisa	PDO	#1	2	7			2	Yes	5
				#2	1				1	No
				#3	3				2	Yes
				#4	1				1	No
		Queijo do Pico	PDO	#3	1	1			0	No	0
		Queijo mestiço de Tolosa	PGI	#3	1	1			1	Yes	1
		Queijo Rabaçal	PDO	#4	1	1			0	No	0
		Queijo São Jorge	PDO	#1	4	16			2	Yes	3
				#2	3				2	Yes
				#3	9				1	No
		Queijo Serpa	PDO	#1	2	4			1	No	3
				#3	2				2	Yes
		Queijo Serra da Estrela	PDO	#1	3	11			2	Yes	5
				#2	4				2	Yes
				#3	4				3	Yes
		Queijo Terrincho	PDO	#3	2	2			1	No	1
		Queijos da Beira Baixa	PDO	#1	2	11			2	Yes	5
				#3	9				3	Yes
	France	Roquefort	PDO	#3	2	2			2	No	2
	Greece	Feta	PDO	#1	2	10			2	Yes	8
				#3	7				6	Yes
				#4	1				1	No
	Italy	Grana Padano	PDO	#1	1	3			1	No	3
				#3	2				2	Yes
		Mozzarella di Bufala Campana	PDO	#1	1	1			1	No	1
		Parmigiano Reggiano	PDO	#1	2	6			1	No	4
				#2	1				1	Yes
				#3	3				2	Yes
		Pecorino Romano	PDO	#1	1	1			1	No	1
	Spain	Cabrales	PDO	#3	1	1			0	No	0
		Mahón-Menorca	PDO	#3	1	1			1	No	1
		Queso Manchego	PDO	#1	2	9			2	Yes	5
				#2	1				1	No
				#3	6				3	Yes
1.4	Portugal	Requeijão Serra da Estrela	PDO	#1	1	2	2		1	Yes	2	2
				#2	1				1	No
1.5	Portugal	Azeite de Moura	PDO	#1	8	15	38		3	Yes	4	12
				#2	2				2	No
				#3	5				2	Yes
		Azeite de Trás-os-Montes	PDO	#1	8	13			5	Yes	6
				#2	2				1	No
				#3	3				2	Yes
		Azeite do Alentejo Interior	PDO	#1	2	2			1	No	1
		Azeites do Norte Aletenjano	PDO	#1	3	6			1	No	1
				#2	2				1	No
				#3	1				1	No
		Azeites do Ribatejo	PDO	#1	2	2			1	No	1
1.6	Portugal	Citrinos do Algarve	PGI	#1	4	5	23		1	Yes	1	3
				#3	1				0	No
		Maçã Bravo de Esmolfe	PDO	#3	1	1			1	No	1
		Maçã da Beira Alta	PGI	#1	1	2			0	No	0
				#3	1				0	No
		Maçã de Alcobaça	PGI	#1	5	11			0	No	1
				#3	4				1	Yes
				#4	2				0	No
		Pêra Rocha do Oeste	PDO	#1	2	4			1	Yes	2
				#3	2				1	Yes
1.8	Italy	Aceto Balsamico di Modena	PGI	#1	3	10	10		1	No	4	4
				#2	2				1	No
				#3	5				4	No
*Category
1.1	Fresh meat
1.2	Meat products
1.3	Cheeses
1.4	Other products of animal origin
1.5	Oils and fats
1.6	Fruits, vegetables and cereals fresh or processed
1.7	Fresh fish, mollusks and crustaceans and derived
1.8	Others such as spices
2.1	Beers
2.2	Chocolate and derived
2.3	Bread, pastry, cakes and alike
2.4	Beverages from plant extracts
2.5	Pasta
2.6	Salt
2.7	Natural gums and resins
2.8	Mustard paste
2.9	Hay
2.1	Essential oils
2.11	Cork
2.12	Cochineal
2.13	Flowers and ornamental plants
2.14	Cotton
2.15	Wool
2.16	Wicker
2.17	Scutched flax
2.18	Leather
2.19	Fur
2.2	Feather
**Type
PDO	Protected Designation of Origin
PGI	Protected Geographical Indication
TSG	Traditional Specialities Guaranteed
DO	Denominação de Origem (Designation of Origin)
IP	Indicação de Procedência (Indication of Source)
IG	Indicación Geográfica (Geographical Indication)

## Sheet: Spain
Category*	Origin	GI Product	Type**	Supermarket	Number of products	Products per GI	Products in the category	All products	Number of brands	Supermarket's brand?	Brands per GI	Brands per category	Total brands
1.1	Spain	Carne de Ávila	PGI	#4	2	2	51	128	1	No	1	6	32
		Carne de la Sierra de Guadarrama	PGI	#3	4	23			1	No	1
				#4	19				0	No
		Sobrasada de Mallorca	PGI	#4	6	6			2	No	2
		Ternasco de Aragón	PGI	#4	1	1			0	No	0
		Ternera Asturiana	PGI	#4	10	10			2	No	2
		Ternera de Extremadura	PGI	#4	2	2			0	No	0
		Ternera Gallega	PGI	#4	7	7			1	Yes	1
1.2	Spain	Botillo del Bierzo	PGI	#2	1	1	16		0	No	0	10
		Chorizo de Cantimpalos	PGI	#4	1	1			1	No	1
		Chorizo Riojano	PGI	#4	1	1			1	No	1
		Jabugo	PDO	#1	1	1			1	No	1
		Jamón Serrano	TSG	#2	1	1			1	No	1
		Salchichón de Vic	PGI	#4	1	1			1	No	1
		Sobrasada de Mallorca	PGI	#1	2	2			1	No	1
	France	Canard à foie gras du Sud-Ouest	PGI	#1	2	4			1	Yes	2
				#4	2				1	Yes
	Italy	Mortadella Bologna	PGI	#1	1	4			1	No	2
				#2	1				1	No
				#4	2				2	No
1.3	Spain	Afuega'l Pitu	PDO	#4	1	1	31		1	Yes	1	16
		Arzùa-Ulloa	PDO	#4	2	2			2	Yes	2
		Cabrales	PDO	#4	1	1			1	Yes	1
		Mahón-Menorca	PDO	#1	1	3			1	No	3
				#4	2				2	Yes
		Queso Casín	PDO	#4	1	1			1	No	1
		Queso Los Beyos	PGI	#4	1	1			1	No	1
		Queso Manchego	PDO	#3	1	2			1	No	2
				#4	1				1	Yes
		Queso Tetilla	PDO	#4	1	1			1	Yes	1
		Queso Zamorano	PDO	#4	1	1			1	No	1
		Roncal	PDO	#4	1	1			1	No	1
		San Simón da Costa	PDO	#4	2	2			2	Yes	2
		Torta de Casar	PDO	#4	1	1			1	No	1
	France	Bleu d'Auvergne	PDO	#1	1	1			1	No	1
		Fourme d'Ambert	PDO	#1	1	1			1	No	1
		Roquefort	PDO	#1	1	1			1	No	1
		Saint-Nectaire	PDO	#1	1	1			1	No	1
	Italy	Gorgonzola	PDO	#2	1	1			1	No	1
		Grana Padano	PDO	#4	2	2			1	No	1
		Mozzarella di Bufala Campana	PDO	#4	1	1			1	No	1
		Parmigiano Reggiano	PDO	#2	3	4			2	Yes	3
			PDO	#4	1				1	No
		Pecorino Romano	PDO	#4	1	1			1	Yes	1
	Netherlands	Gouda Holland	PGI	#4	1	1			1	No	1
1.5	Spain	Montes de Toledo	PDO	#4	1	1	1		1	No	1	1
1.6	Spain	Alcachofa de Tudela	PGI	#4	1	1	18		1	Yes	1	8
		Berenjena de Almagro	PGI	#4	1	1			1	Yes	1
		Calasparra	PDO	#4	1	1			1	Yes	1
		Espárrago de Navarra	PGI	#2	1	6			1	Yes	5
				#4	5				5	Yes
		Faba Asturiana	PGI	#4	1	1			1	Yes	1
		Garbanzo de Escacena	PGI	#4	1	1			1	No	1
		Garbanzo de Fuentesaúco	PGI	#4	1	1			1	Yes	1
		Judías de El Barco de Ávila	PGI	#4	1	1			1	No	1
		Lenteja de la Armuña	PGI	#4	1	1			1	Yes	1
		Pasas de Málaga	PDO	#1	1	1			1	No	1
		Pimiento Asado del Bierzo	PGI	#4	1	1			1	Yes	1
		Pimientos del Piquillo de Lodosa	PDO	#4	2	2			2	Yes	2
1.8	Spain	Azafrán de la Mancha	PDO	#4	1	1	7		1	Yes	1	3
		Pimentón de Murcia	PDO	#4	2	2			1	Yes	1
		Pimentón de la Vera	PDO	#4	1	1			1	Yes	1
		Vinagre de Jerez	PDO	#4	3	3			3	Yes	3
2.3	Spain	Jijona	PGI	#4	1	1	4		1	Yes	1	2
		Mantecadas de Astorga	PGI	#4	1	1			1	No	1
		Sobao Pasiego	PGI	#4	1	1			1	Yes	1
		Turrón de Alicante	PGI	#4	1	1			1	Yes	1
*Category
1.1	Fresh meat
1.2	Meat products
1.3	Cheeses
1.4	Other products of animal origin
1.5	Oils and fats
1.6	Fruits, vegetables and cereals fresh or processed
1.7	Fresh fish, mollusks and crustaceans and derived
1.8	Others such as spices
2.1	Beers
2.2	Chocolate and derived
2.3	Bread, pastry, cakes and alike
2.4	Beverages from plant extracts
2.5	Pasta
2.6	Salt
2.7	Natural gums and resins
2.8	Mustard paste
2.9	Hay
2.1	Essential oils
2.11	Cork
2.12	Cochineal
2.13	Flowers and ornamental plants
2.14	Cotton
2.15	Wool
2.16	Wicker
2.17	Scutched flax
2.18	Leather
2.19	Fur
2.2	Feather
**Type
PDO	Protected Designation of Origin
PGI	Protected Geographical Indication
TSG	Traditional Specialities Guaranteed
DO	Denominação de Origem (Designation of Origin)
IP	Indicação de Procedência (Indication of Source)
IG	Indicación Geográfica (Geographical Indication)

## Sheet: Argentina
Category*	Origin	GI Product	Type**	Supermarket	Number of products	Products per GI	Products in the category	All products	Number of brands	Supermarket's brand?	Brands per GI	Brands per category	Total brands
1.2	Argentina	Salame de Tandil	DO	#1	5	10	22	180	5	No	1	5	37
				#3	1				1	No
				#4	4				1	No
	Spain	Chorizo Riojano	PGI	#1	2	2			1	No	1
		Jamón Serrano	TSG	#1	10	10			4	No	4
1.3	Denmark	Danablu	PGI	#1	3	3	10		2	No	2	7
	France	Gruyère	PGI	#1	2	2			2	No	2
	Italy	Gorgonzola	PDO	#1	1	1			1	No	1
		Grana Padano	PDO	#1	1	1			1	No	1
		Mozzarella	PDO	#1	1	1			1	No	1
		Parmigiano Reggiano	PDO	#1	1	1			1	No	1
		Pecorino Romano	PDO	#1	1	1			1	No	1
1.8	Argentina	Yerba Mate	IG	#1	22	148	148		8	No	25	25
				#2	30				11	Yes
				#3	50				17	No
				#4	46				13	Yes
*Category
1.1	Fresh meat
1.2	Meat products
1.3	Cheeses
1.4	Other products of animal origin
1.5	Oils and fats
1.6	Fruits, vegetables and cereals fresh or processed
1.7	Fresh fish, mollusks and crustaceans and derived
1.8	Others such as spices
2.1	Beers
2.2	Chocolate and derived
2.3	Bread, pastry, cakes and alike
2.4	Beverages from plant extracts
2.5	Pasta
2.6	Salt
2.7	Natural gums and resins
2.8	Mustard paste
2.9	Hay
2.1	Essential oils
2.11	Cork
2.12	Cochineal
2.13	Flowers and ornamental plants
2.14	Cotton
2.15	Wool
2.16	Wicker
2.17	Scutched flax
2.18	Leather
2.19	Fur
2.2	Feather
**Type
PDO	Protected Designation of Origin
PGI	Protected Geographical Indication
TSG	Traditional Specialities Guaranteed
DO	Denominação de Origem (Designation of Origin)
IP	Indicação de Procedência (Indication of Source)
IG	Indicación Geográfica (Geographical Indication)

## Sheet: Brazil
Category*	Origin	GI Product	Type**	Supermarket	Number of products	Products per GI	Products in the category	All products	Number of brands	Supermarket's brand?	Brands per GI	Brands per category	Total brands
1.2	Italy	Mortadella Bologna	PGI	#1	1	11	16	60	1	No	4	7	23
				#2	2				2	No
				#3	5				3	No
				#4	3				2	No
	Spain	Jamón Serrano	TSG	#1	1	5			1	No	3
				#2	3				3	Yes
				#3	1				1	No
1.3	Brazil	Canastra	IP	#1	1	2	2		1	No	1	7
				#3	1				1	No
	France	Gruyère	PGI	#1	1	5	14		1	No	2
				#2	1				1	No
				#3	3				2	No
	Italy	Grana Padano	PDO	#2	1	2			1	No	1
			PDO	#3	1				1	No
		Mozzarella	TSG	#2	2	3			1	No	1
				#3	1				1	No
		Parmigiano Reggiano	PDO	#3	1	1			1	No	1
		Pecorino Romano	PDO	#2	2	2			1	No	1
	Spain	Queso Manchego	PDO	#2	1	1			1	No	1
1.5	Greece	Chania Kritis	PGI	#3	1	1	5		1	No	1	2
	Portugal	Azeites do Norte Alentejano	PDO	#3	4	4			1	No	1
1.6	Portugal	Pêra Rocha do Oeste	PDO	#2	1	2	2		0	No	0	0
				#3	1				0	No
1.8	Brazil	Alta Mogiana	IP	#1	6	8	21		3	No	3	7
				#2	1				1	No
				#4	1				1	No
		Matas de Minas	IP	#4	1	1			1	No	1
		Região Cerrado Mineiro	IP	#1	3	7			3	No	3
				#2	2				1	No
				#4	2				1	No
	Italy	Aceto Balsamico di Modena	PGI	#2	5	5			4	No	4
*Category
1.1	Fresh meat
1.2	Meat products
1.3	Cheeses
1.4	Other products of animal origin
1.5	Oils and fats
1.6	Fruits, vegetables and cereals fresh or processed
1.7	Fresh fish, mollusks and crustaceans and derived
1.8	Others such as spices
2.1	Beers
2.2	Chocolate and derived
2.3	Bread, pastry, cakes and alike
2.4	Beverages from plant extracts
2.5	Pasta
2.6	Salt
2.7	Natural gums and resins
2.8	Mustard paste
2.9	Hay
2.1	Essential oils
2.11	Cork
2.12	Cochineal
2.13	Flowers and ornamental plants
2.14	Cotton
2.15	Wool
2.16	Wicker
2.17	Scutched flax
2.18	Leather
2.19	Fur
2.2	Feather
**Type
PDO	Protected Designation of Origin
PGI	Protected Geographical Indication
TSG	Traditional Specialities Guaranteed
DO	Denominação de Origem (Designation of Origin)
IP	Indicação de Procedência (Indication of Source)
IG	Indicación Geográfica (Geographical Indication)

## Sheet: Paraguay
Category*	Origin	GI Product	Type**	Supermarket	Number of products	Products per GI	Products in the category	All products	Number of brands	Supermarket's brand?	Brands per GI	Brands per category	Total brands
1.2	Argentina	Salame de Tandil	DO	#3	4	4	7	43	1	No	1	2	13
	Spain	Jamón Serrano	TSG	#1	2	3			1	No	1
				#3	1				1	No
1.3	France	Roquefort	PDO	#1	1	3	13		1	No	3	6
				#2	1				1	No
				#4	1				1	No
	Italy	Grana Padano	PDO	#1	1	3			1	No	1
				#3	2				1	No
		Parmigiano Reggiano	PDO	#1	1	5			1	No	1
				#3	3				1	No
				#4	1				1	No
	Spain	Queso Manchego	PDO	#1	1	2			1	No	2
				#3	1				1	No
1.8	Argentina	Yerba mate	IG	#1	3	5	23		1	No	1	5
				#4	2				1	No
	Italy	Aceto Balsamico di Modena	PGI	#1	7	18			3	No	4
				#2	6				4	No
				#4	5				2	No
*Category
1.1	Fresh meat
1.2	Meat products
1.3	Cheeses
1.4	Other products of animal origin
1.5	Oils and fats
1.6	Fruits, vegetables and cereals fresh or processed
1.7	Fresh fish, mollusks and crustaceans and derived
1.8	Others such as spices
2.1	Beers
2.2	Chocolate and derived
2.3	Bread, pastry, cakes and alike
2.4	Beverages from plant extracts
2.5	Pasta
2.6	Salt
2.7	Natural gums and resins
2.8	Mustard paste
2.9	Hay
2.1	Essential oils
2.11	Cork
2.12	Cochineal
2.13	Flowers and ornamental plants
2.14	Cotton
2.15	Wool
2.16	Wicker
2.17	Scutched flax
2.18	Leather
2.19	Fur
2.2	Feather
**Type
PDO	Protected Designation of Origin
PGI	Protected Geographical Indication
TSG	Traditional Specialities Guaranteed
DO	Denominação de Origem (Designation of Origin)
IP	Indicação de Procedência (Indication of Source)
IG	Indicación Geográfica (Geographical Indication)

[truncated: 1 more sheets: Uruguay]
